# Supplementary material for: Ureidothiophene inhibits interaction of bacterial RNA polymerase with –10 promotor element
Source: PubMed Central journal article supplement (PMC7430646; doi:10.1093/nar/gkaa591), 2020-07-11
Supplement: gkaa591_supplemental_file.pdf [file gkaa591_supplemental_file.pdf]

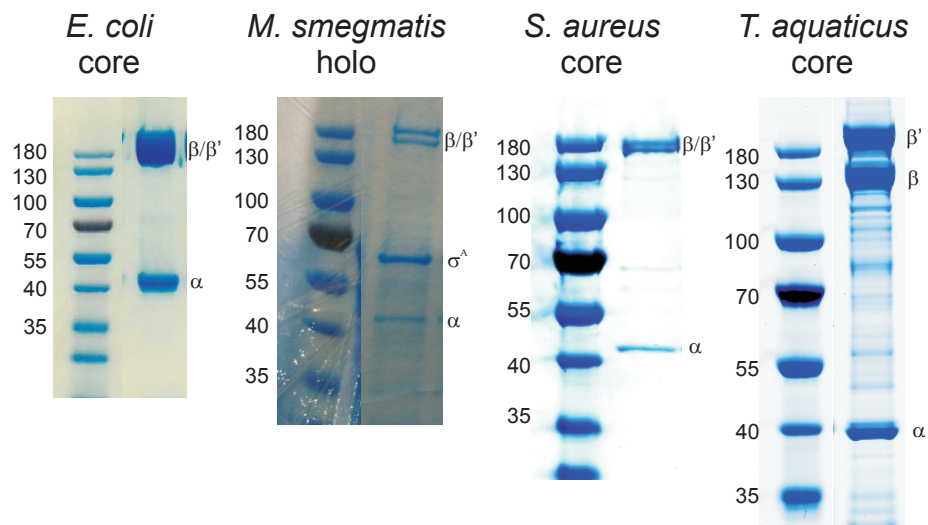

Figure S1. SDS-gels of the purified RNAP core and holoenzymes. Left lane in each gel is a size marker.
